# Supplementary material for: Low Maternal Capital Predicts Life History Trade-Offs in Daughters: Why Adverse Outcomes Cluster in Individuals
Source: PubMed Central journal article supplement (PMC6685417; doi:10.3389/fpubh.2019.00206), 2019-07-31
Supplement: Table_1.pdf [file Table_1.pdf]

Supplementary online material for

Low maternal capital predicts life history trade-offs in daughters: why adverse outcomes cluster in individuals

Jonathan CK Wells, Tim J Cole, Mario Cortina-Borja, Rebecca Sear, David A Leon, Akanksha A Marphatia, Joseph Murray, Fernando César Wehrmeister, Paula Duarte Oliveira, Helen Gonçalves, Isabel O. Oliveira, Ana Maria Baptista Menezes

Supplementary online Table 1. Differences between those followed up versus those not followed

| Maternal characteristic                        | Followed up (n=2091) |      | Not followed (n=554) |      | OR*         | 95% CI     | p       |
|------------------------------------------------|----------------------|------|----------------------|------|-------------|------------|---------|
|                                                | N                    | %    | N                    | %    |             |            |         |
| Parity 0 <sup>§</sup>                          | 736                  | 35.2 | 188                  | 33.9 | 1.06        | 0.87, 1.29 | 0.5     |
| Parity 4+ <sup>§</sup>                         | 221                  | 10.6 | 66                   | 11.9 | 0.87        | 0.65, 1.17 | 0.3     |
| Smoking in pregnancy <sup>§</sup>              | 705                  | 33.7 | 204                  | 36.8 | 0.87        | 0.72, 1.06 | 0.17    |
| Alcohol in pregnancy <sup>§</sup>              | 122                  | 5.8  | 22                   | 4.0  | 0.67        | 0.42, 1.06 | 0.086   |
|                                                |                      |      |                      |      |             |            |         |
|                                                | Mean                 | SD   | Mean                 | SD   | Difference* | 95% CI     | p       |
| Maternal age (y) <sup>#</sup>                  | 26.1                 | 6.3  | 25.8                 | 6.6  | 0.3         | -0.3, 0.9  | 0.3     |
| Maternal height (cm) <sup>#</sup>              | 159.9                | 6.7  | 159.4                | 7.1  | 0.5         | -0.1, 1.1  | 0.13    |
| Maternal BMI (kg/m <sup>2</sup> ) <sup>#</sup> | 22.9                 | 3.7  | 22.4                 | 3.7  | 0.4         | 0.1, 0.8   | 0.013   |
| Maternal education (y) <sup>#</sup>            | 6.7                  | 3.5  | 6.5                  | 4.0  | 0.2         | -0.1, 0.6  | 0.2     |
| Family income (minimum wages) <sup>#</sup>     | 4.3                  | 5.8  | 4.4                  | 5.9  | -0.1        | -0.7, 0.4  | 0.6     |
|                                                |                      |      |                      |      |             |            |         |
| <b>Daughter characteristic</b>                 | Mean                 | SD   | Mean                 | SD   | Difference* | 95% CI     | p       |
| Birth weight (g)                               | 3115                 | 510  | 3012                 | 578  | -103        | -53, -152  | <0.0001 |
| Birth length (cm)                              | 48.5                 | 2.3  | 48.2                 | 2.3  | -0.3        | -0.1, -0.5 | 0.013   |
| Gestational age (weeks)                        | 38.6                 | 1.5  | 38.3                 | 1.7  | -0.3        | -0.1, 0.4  | 0.001   |

\* OR and difference values are calculated for those not followed up, relative to those followed up

§ Categorical outcomes compared by Chi-square test

# Continuous outcomes tested by two-sample t-test
