# Supplementary material for: Low Maternal Capital Predicts Life History Trade-Offs in Daughters: Why Adverse Outcomes Cluster in Individuals
Source: PubMed Central journal article supplement (PMC6685417; doi:10.3389/fpubh.2019.00206), 2019-07-31
Supplement: Table_2.pdf [file Table_2.pdf]

## Supplementary online material for

### Low maternal capital predicts life history trade-offs in daughters: why adverse outcomes cluster in individuals

Jonathan CK Wells, Tim J Cole, Mario Cortina-Borja, Rebecca Sear, David A Leon, Akanksha A Marphatia, Joseph Murray, Fernando César Wehrmeister, Paula Duarte Oliveira, Helen Gonçalves, Isabel O. Oliveira, Ana Maria Baptista Menezes

**Supplementary online Table 2.** Numeric results for comparisons of (a) reproducing vs non-reproducing daughters and (b) low-capital vs high-capital mothers

| Trait                        | Data for Figure 2 Panel A<br>Early-reproducing daughters,<br>relative to childless peers <sup>1</sup> |              | Data for Figure 2 Panel B<br>Daughters of low-capital<br>mothers, relative to those of<br>high-capital mothers <sup>2</sup> |              |
|------------------------------|-------------------------------------------------------------------------------------------------------|--------------|-----------------------------------------------------------------------------------------------------------------------------|--------------|
|                              | OR                                                                                                    | 95%CI        | OR                                                                                                                          | 95%CI        |
| <b>Pregnancy traits</b>      |                                                                                                       |              |                                                                                                                             |              |
| Parity 0                     | 0.63                                                                                                  | 0.48, 0.83   | 0.77                                                                                                                        | 0.46, 1.30   |
| Parity 4 <sup>+</sup>        | 1.66                                                                                                  | 1.17, 2.35   | 2.90                                                                                                                        | 1.30, 6.46   |
| Smoking in pregnancy         | 1.99                                                                                                  | 1.56, 2.54   | 2.52                                                                                                                        | 1.49, 4.27   |
| Alcohol in pregnancy         | 0.78                                                                                                  | 0.48, 1.25   | 0.93                                                                                                                        | 0.35, 2.52   |
|                              |                                                                                                       |              |                                                                                                                             |              |
| <b>Developmental traits</b>  | <b>% difference</b>                                                                                   | <b>95%CI</b> | <b>% difference</b>                                                                                                         | <b>95%CI</b> |
| Birth weight (g)             | -4.7                                                                                                  | -6.8, -2.6   | -13.7                                                                                                                       | -17.7, -9.6  |
| Birth length (cm)            | -0.8                                                                                                  | -1.4, -0.2   | -3.1                                                                                                                        | -4.2, -2.0   |
| Gestational age (weeks)      | -0.5                                                                                                  | -1.0, -0.0   | -0.3                                                                                                                        | -1.2, 0.5    |
| Weight 1 year (kg)           | -1.9                                                                                                  | -4.9, 1.1    | -16.0                                                                                                                       | -21.0, -10.9 |
| Length 1 year (cm)           | -1.8                                                                                                  | -2.9, -0.8   | -5.2                                                                                                                        | -7.0, -3.4   |
| Age at menarche (y)          | -0.4                                                                                                  | -1.8, 1.0    | 4.4                                                                                                                         | 1.8, 6.9     |
|                              |                                                                                                       |              |                                                                                                                             |              |
| <b>Adult physical traits</b> | <b>% difference</b>                                                                                   | <b>95%CI</b> | <b>% difference</b>                                                                                                         | <b>95%CI</b> |
| Height (cm)                  | -1.6                                                                                                  | -2.1, -1.1   | -3.9                                                                                                                        | -4.9, -2.9   |
| Weight (kg)                  | 1.3                                                                                                   | -1.2, 3.9    | -14.6                                                                                                                       | -19.6, -9.5  |
| BMI (kg/m <sup>2</sup> )     | 4.5                                                                                                   | 2.1, 6.8     | -6.8                                                                                                                        | -11.7, -1.9  |
| Fat-free mass (kg)           | 0.9                                                                                                   | -0.7, 2.5    | -9.6                                                                                                                        | -12.7, -6.6  |

|                                        |           |              |           |              |
|----------------------------------------|-----------|--------------|-----------|--------------|
| Fat mass (kg)                          | 1.8       | -3.5, 7.1    | -26.3     | -36.9, -15.7 |
| Fat mass index (kg/m <sup>2</sup> )    | 4.9       | -0.3, 10.2   | -18.6     | -28.4, -8.7  |
| Triceps skinfold (mm)                  | -7.7      | -12.8, -2.5  | -24.5     | -36.4, -12.6 |
| Subscapular (mm)                       | 5.0       | -0.6, 10.6   | -10.0     | -21.2, 1.1   |
| Glucose (mg/dL)                        | -0.6      | -2.8, 1.6    | -0.3      | -4.4, 3.8    |
| Cholesterol (mg/dL)                    | -3.0      | -5.1, -0.8   | -5.8      | -10.3, -1.2  |
| HDL (mg/dL)                            | -8.7      | -11.0, -6.4  | -9.3      | -14.1, -4.5  |
| LDL (mg/dL)                            | -0.2      | -3.3, 3.0    | -5.0      | -11.7, 1.8   |
| Triglycerides (mg/dL)                  | -3.7      | -8.5, 1.0    | -8.0      | -18.8, 2.8   |
| HbA1c (%)                              | -0.6      | -1.9, 0.7    | 2.5       | 0.1, 5.1     |
| Systolic BP (mmHG)                     | -0.3      | -1.4, 0.8    | -1.2      | -3.6, 1.1    |
| Diastolic BP (mmHG)                    | -2.2      | -3.8, -0.7   | -1.7      | -4.6, 1.2    |
|                                        |           |              |           |              |
|                                        | <b>OR</b> | <b>95%CI</b> | <b>OR</b> | <b>95%CI</b> |
| Studying past year                     | 0.10      | 0.07, 0.13   | 0.20      | 0.10, 0.39   |
| Studying now                           | 0.10      | 0.07, 0.14   | 0.22      | 0.13, 0.37   |
| Received allowance in last month       | 0.42      | 0.32, 0.53   | 0.36      | 0.21, 0.62   |
| Received payment for work in last year | 0.45      | 0.32, 0.63   | 1.59      | 0.53, 4.74   |
| Smoked at least once in last week      | 3.30      | 2.56, 4.26   | 1.73      | 0.96, 3.14   |
| Current smoker                         | 3.44      | 2.57, 4.59   | 1.91      | 0.94, 3.89   |
| Violent crime                          | 1.55      | 1.03, 2.32   | 2.34      | 1.05, 5.25   |

<sup>1</sup> Coefficients for early-reproducing daughters (n=302) relative to non-reproducing daughters (n=1782)

<sup>2</sup> Coefficients for daughters of low-capital mothers (n=72) relative to daughters of high-capital mothers (n=399)

Categorical variables assessed by chi-square test (expressed as odds ratio (OR) and 95% confidence intervals (CI))

Continuous variables assessed after natural log transformation by independent-samples t-test (multiplied by 100%, expressed as % difference) and 95% confidence intervals (CI)
